# Supplementary material for: Investigation of the stoichiometric deviation between the mixed cation, mixed halide lead perovskite thin film and its precursor solution
Source: Royal Society of Chemistry journal article supplement (doi:10.1039/d4tc00318g), 2024-01-01
Supplement: d4tc00318g1.pdf [file d4tc00318g1.pdf]

Supporting Information

**Investigation of the Stoichiometric Deviation between Mixed Cation, Mixed Halide Lead Perovskite Thin Film and its Precursor Solution**

*Hio-Kun Si<sup>a‡</sup>, Ahmed Fouad Musa<sup>a‡</sup>, Tzu-Sen Su<sup>b\*</sup>, Tzu-Chien Wei<sup>a</sup>*

H-K Si, A. F. Musa, T-S Su, T-C Wei

<sup>a</sup> Department of Chemical Engineering, National Tsing Hua University, 101, Section 2, Kuang-Fu Road, Hsinchu 300044, Taiwan, Republic of China.

<sup>b</sup> Graduate Institute of Energy and Sustainability Tech, National Taiwan University of Science and Technology, No.43, Keelung Rd., Sec.4, Da'an Dist., Taipei City 106335, Taiwan (R.O.C.)

<sup>‡</sup> These two authors contributed equally.

\*Corresponding author. Email: [tssu@mail.ntust.edu.tw](mailto:tssu@mail.ntust.edu.tw)

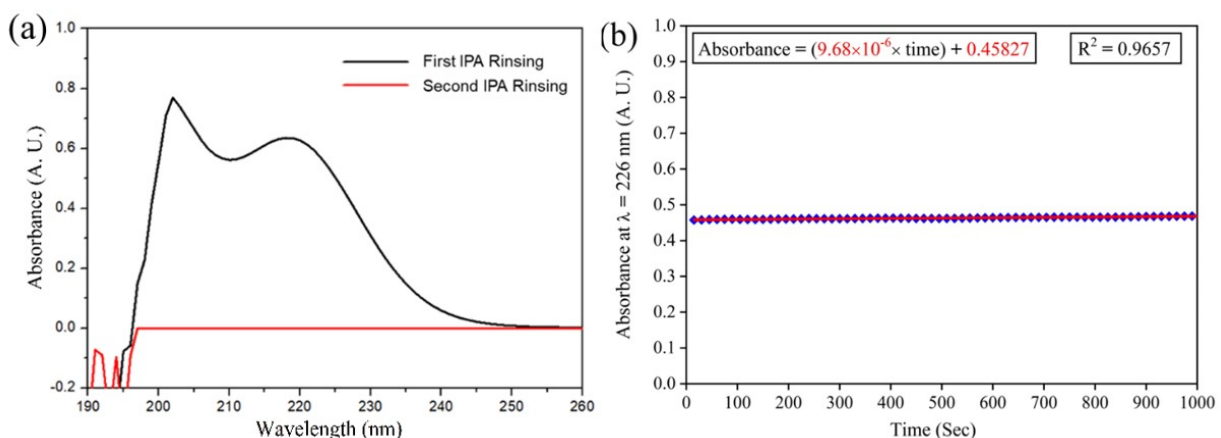

**Figure S1.** The absorbance spectra of IPA-rinsed perovskite films with (a) two rinses. (b) 1000 seconds rinsing

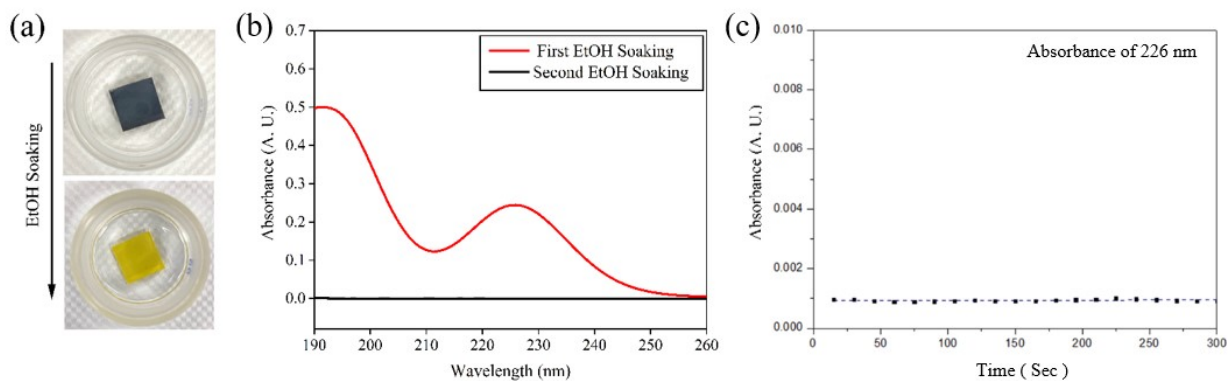

**Figure S2.** (a) Images and (b) first and second time of absorbance spectra of solution for perovskite films soaked in EtOH.(c) absorbance of solution relative to soaking time of solution for perovskite films soaked in EtOH

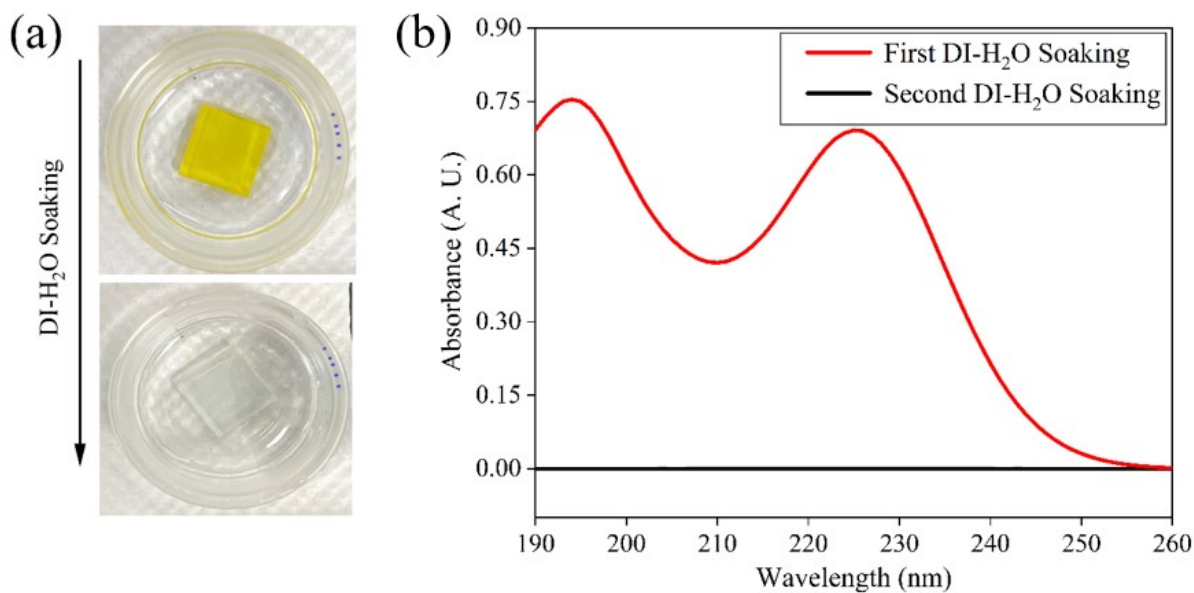

**Figure S3.** (a) Images and (b) absorbance spectra of PbI<sub>2</sub> films soaked in DI H<sub>2</sub>O solution

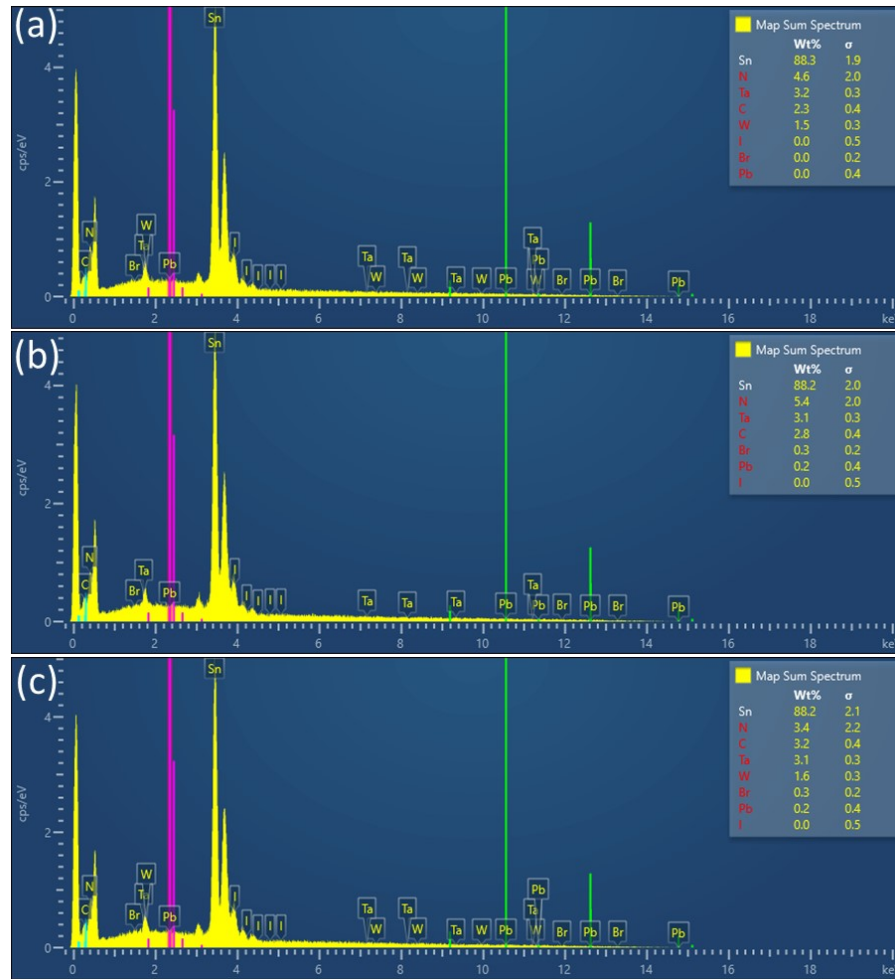

**Figure S4.** The EDX results of the substrate after breakdown of a PVSK film procedure (a) PVSK-1 (80:20), (b) PVSK-1 (60:40), (c) PVSK-2 (75:25).

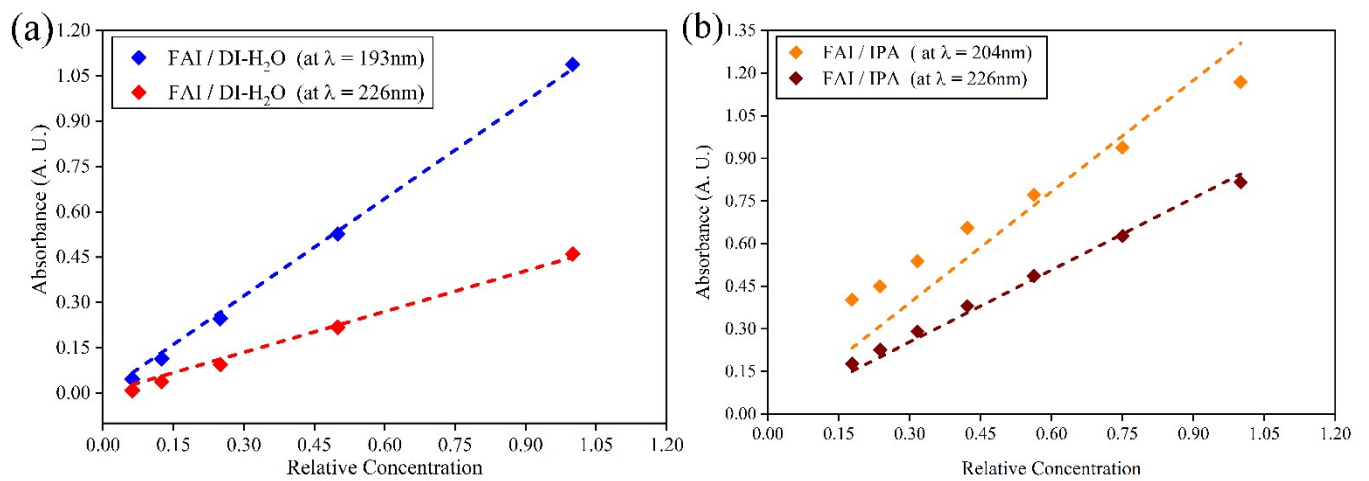

**Figure S5.** Linear regression trend line of maximum absorbance for (a) FAI/DI-H<sub>2</sub>O (b) FAI/IPA

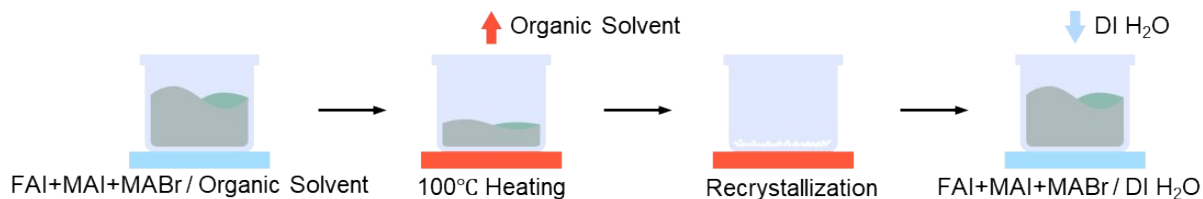

**Figure S6.** The process of substituting DI-H<sub>2</sub>O for organic solvent

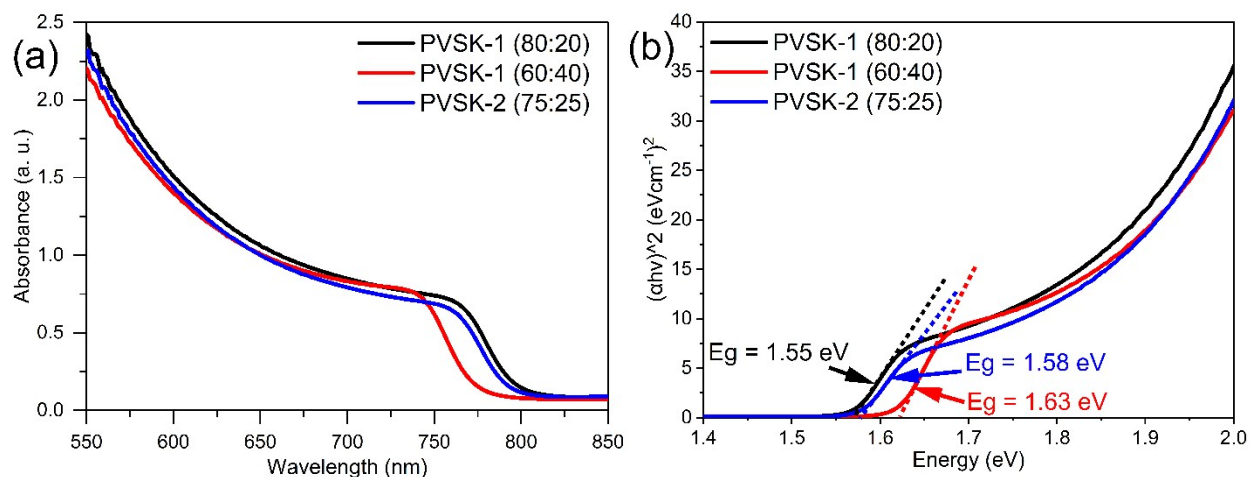

**Figure S7.** UV-visible absorbance (a) and calculated bandgap (b) of PVSK-1 (80:20), PVSK-1 (60:40), and PVSK-2 (75:25) perovskite film

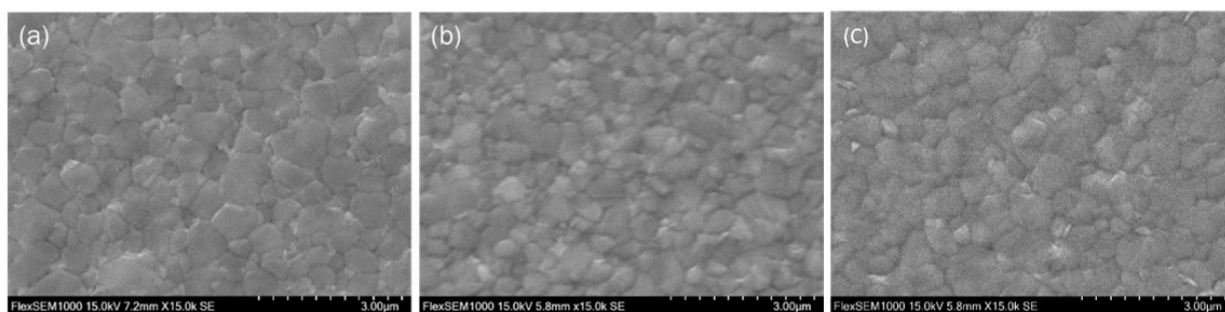

**Figure S8.** SEM images of perovskite film synthesized by the one-step and two-step methods at different ratios; a) PVSK-1 (80:20), b) PVSK-1 (60:40), c) PVSK-2 (75:25)

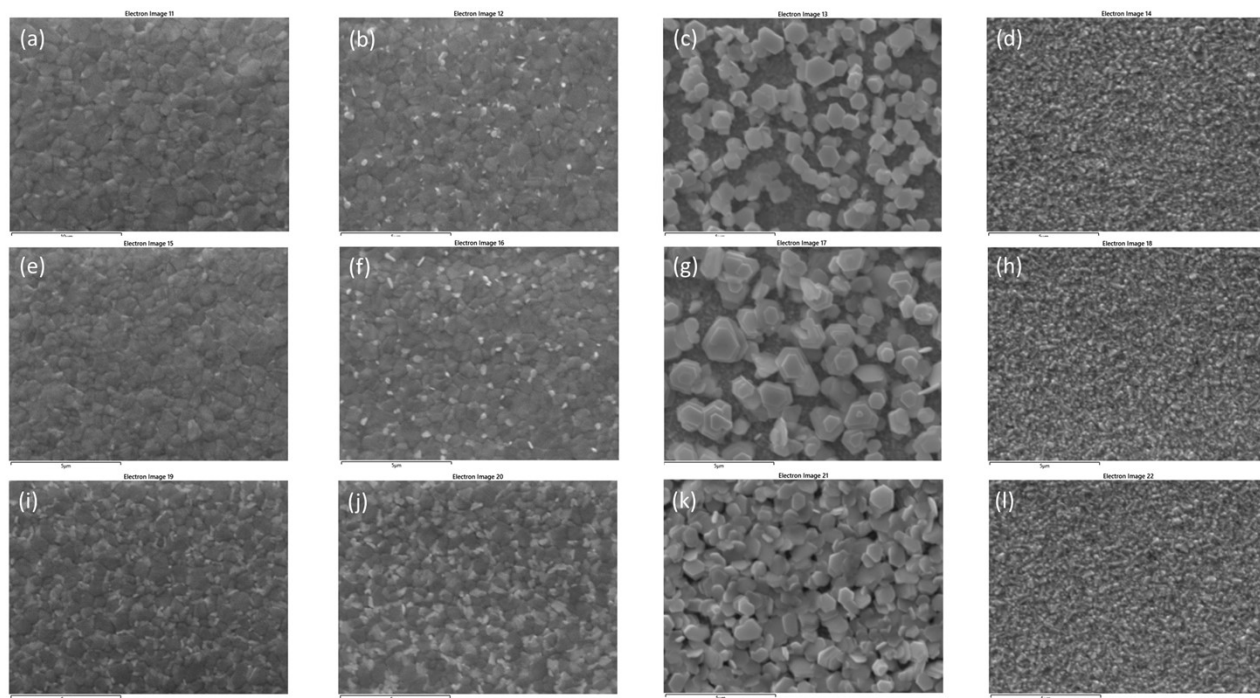

**Figure S9.** The SEM images of perovskite made by PVSK-1 (80:20) (a) as prepared, (b) IPA rinsing, (c) EtOH soaking, (d) DI-H<sub>2</sub>O soaking, PVSK-1 (60:40) (e) as prepared, (f) IPA rinsing, (g) EtOH soaking, (h) DI-H<sub>2</sub>O soaking and PVSK-2 (75:25) (i) as prepared, (j) IPA rinsing, (k) EtOH soaking, (l) DI-H<sub>2</sub>O soaking

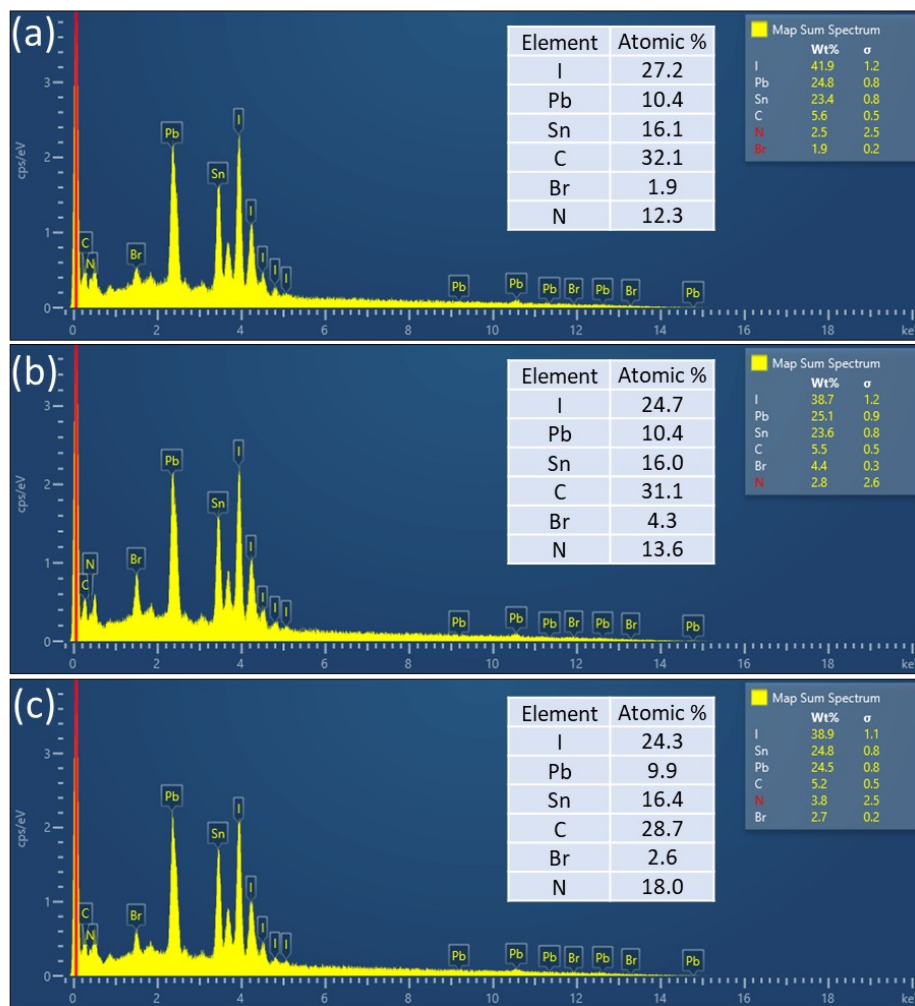

**Figure S10.** The EDX results of the PVSK film after IPA rinsing (a) PVSK-1 (80:20), (b) PVSK-1 (60:40), (c) PVSK-2 (75:25)
